# Supplementary material for: Hyperhomocysteinemia induced by excessive methionine intake promotes rupture of cerebral aneurysms in ovariectomized rats
Source: PubMed Central journal article supplement (PMC4924228; doi:10.1186/s12974-016-0634-3), 2016-06-27
Supplement: 12974_2016_634_MOESM1_ESM.pdf [file 12974_2016_634_MOESM1_ESM.pdf]

**Figure S1**

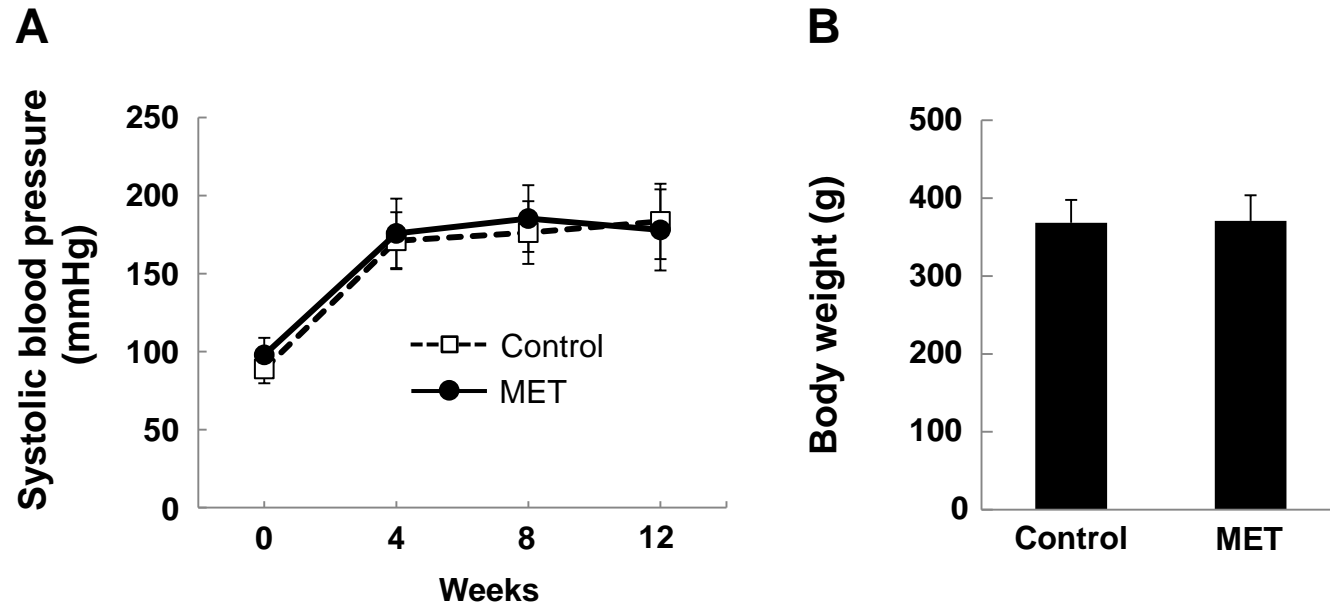

- A. The systolic blood pressure was measured at 4-week intervals with the tail-cuff method. There was no difference between the two groups. Data are the mean  $\pm$  SD.
- B. The body weight 12 weeks after bilateral posterior renal artery ligation was recorded. Data are the mean  $\pm$  SD for 10 rats in both groups.
