# Supplementary material for: Hyperhomocysteinemia induced by excessive methionine intake promotes rupture of cerebral aneurysms in ovariectomized rats
Source: Springer Nature journal article supplement (doi:10.1186/s12974-016-0634-3), 2016-06-27
Supplement: MOESM3 [file 10289424]

**Figure S3**

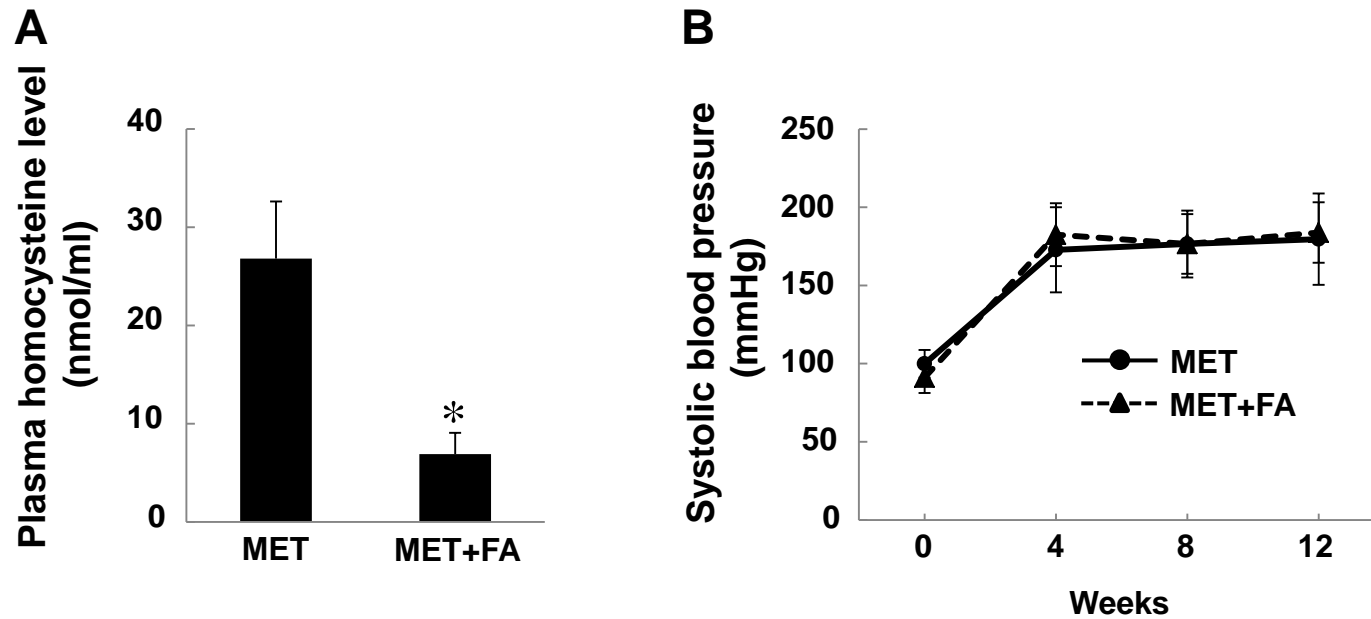

**A.** Plasma homocysteine level measured by radioimmunoassay.

\* $p < 0.05$  vs methionine (MET)-treated rats. Student's *t* test (each group,  $n = 5$ , mean  $\pm$  SD).

**B.** The systolic blood pressure was measured every 4 weeks using the tail-cuff method. Folic acid did not affect the systolic blood pressure. Data are the mean  $\pm$  SD in both groups.

MET+FA: Rats treated with MET plus folic acid.
